# Axonal tree morphology and signal propagation dynamics improve interneuron classification

Netanel Ofer<sup>1,2</sup>, Orit Shefi<sup>1,2,\*</sup>, and Gur Yaari<sup>1,\*</sup>

<sup>1</sup>Faculty of Engineering, Bar Ilan University, Ramat Gan 5290002, Israel.

<sup>2</sup>Bar Ilan Institute of Nanotechnologies and Advanced Materials, Bar Ilan University, Ramat Gan 5290002, Israel.

## Abstract

Neurons are diverse and can be differentiated by their morphological, electrophysiological, and molecular properties. Current morphology-based classification approaches largely rely on the dendritic tree structure or on the overall axonal projection layout. Here, we use data from public databases of neuronal reconstructions and membrane properties to study the characteristics of the axonal and dendritic trees for interneuron classification. We show that combining signal propagation patterns observed by biophysical simulations of the activity along ramified axonal trees with morphological parameters of the axonal and dendritic trees, significantly improve classification results compared to previous approaches. The classification schemes introduced here can be utilized to robustly classify neuronal subtypes in a functionally relevant manner. Our work paves the way for understanding and utilizing form-function principles in realistic neuronal reconstructions.

## Introduction

Quantitative analysis of neuronal types and their properties is critical for better understanding and deciphering brain function (1, 2). Despite the attempts to standardize the terminology for neuronal types, there is no clear consensus regarding neuron nomenclature, leaving neuronal classification as an ongoing challenge (3, 4). To date, interneuron classification is based on morphology (5), membrane and firing patterns (6, 7), connectivity patterns (8), neurochemical markers (9), transcriptome (10–12), and epigenomics (13). The morphology-based classification approaches include dendritic tree geometry (14, 15) and axonal projection (16, 17), where directionalities of axons are taken into account. The interneuron's axonal tree arbor enables better classification of cell types than the dendritic tree (8, 18). Topological persistence-based methods were also developed to support comparisons between individual neurons and classification of neurons (19, 20). Topological motifs of the axonal tree were found to differentiate interneurons and pyramidal cells (21, 22). So far, no studies have used the geometrical properties of the axonal tree, specifically the axonal branch diameters and lengths, for neuronal classification.

Different types of neurons have different ion channels with various kinematics and densities, spreading across the soma, axons, and dendrites (23, 24). As part of the *Blue Brain Project* (BBP), evolutionary algorithms were used to fit the experimental recordings of rat cortical neurons with specific ion channel types and parameters. Firing patterns are commonly defined by neuronal responses to step currents at the soma. Combinations of continuous, delayed, and bursting onset patterns, with accommodating, non-accommodating, stuttering, irregular, and adapting steady-state behaviors, led to establishing eleven electrical types (e-types), ten of which exist in interneurons and one in pyramidal cells. The distribution of each of the ion channels along specific neuronal types and cortical layers as well as the fitted parameters are indicated in the Neocortical Microcircuit Collaboration Portal (NMC) (25). Hence, activity-based neuronal classification is a promising and interesting path that remains to be explored.

35 Here, we have leveraged the advancement of imaging techniques that led to growth in high-resolution 3D  
36 reconstructions along with the development of big neuronal morphology databases, such as the *Blue Brain*  
37 *Project* (26), the *Allen Institute Brain Atlas* (27), and *NeuroMorpho.Org* (28), to classify interneurons into  
38 subtypes based on their morphology and activity. We first classified interneurons based on axonal tree mor-  
39 phology parameters, obtaining fairly accurate discrimination. Adding dendritic tree morphology to the axonal  
40 one improved the prediction rates. Finally, we considered an axonal tree activity-based neuronal classification  
41 and further improved the classification’s results. Building a classification scheme based on all these features is  
42 shown here to robustly classify neurons in a functionally relevant manner.

## 43 Results

### 44 Classification of interneuron types by morphology

45 To classify interneurons based on axonal tree morphology, high-resolution traced neurons were analyzed. For  
46 this purpose, neuron reconstructions were downloaded from the *NeuroMorpho.Org* database, and filtered for  
47 several criteria to obtain a high-quality dataset for classification (Table 1). Only neurons from a cortex with  
48 at least 10 axonal branches and 1,000 axonal segments were included. To achieve high precision in axonal  
49 tree geometry, only neurons with at least 10 axonal diameter values measured were included. The resulting  
50 filtered dataset is diverse because the interneurons were taken from different cortical layers of male and female  
51 rats (n=312, 78%) and mice (n=90, 22%), and were analyzed by different labs. We focus here on the most  
52 prominent interneuron types: basket cell (BC), Martinotti cell (MC), chandelier cell (CHC), neurogliaform  
53 cell (NGF), bitufted cell (BTC), double-bouquet cell (DBC), and bipolar cell (BP) (29). Figure 1A–G show  
54 representative examples of the interneuron types.

| Filter criteria                                                 | basket | Martinotti | neurogliaform | bitufted | double bouquet | chandelier | bipolar |
|-----------------------------------------------------------------|--------|------------|---------------|----------|----------------|------------|---------|
| All data in NeuroMorpho.Org 7.4                                 | 829    | 294        | 209           | 93       | 64             | 68         | 606     |
| Cortex only                                                     | 564    | 228        | 139           | 88       | 63             | 36         | 40      |
| With both axon and dendrite data                                | 508    | 224        | 127           | 56       | 56             | 31         | 40      |
| $\geq 10$ axonal branches and $\geq 1,000$ ax-<br>onal segments | 437    | 193        | 122           | 53       | 52             | 29         | 34      |
| $\geq 10$ axonal diameter values measured                       | 196    | 99         | 40            | 20       | 20             | 17         | 10      |

**Table 1: Neuron reconstructions filtration.** The table summarizes the number of neurons that were included after each filtration step according to their types.

55 Each neuron reconstruction is characterized by 28 features that can be divided into three categories: over-  
56 all topology, branch length, and diameter (Table 2). Overall topology measurements include the number of  
57 branches, branch order, Sholl analysis, the axonal tree size, and symmetry. Branch length-related parameters  
58 include the total length, branch lengths, path lengths, and the branch length divided by the square root of the  
59 diameter. The diameter-related parameters include the branch diameter and the geometric ratio (GR). GR is  
60 defined as the ratio between the sum of the diameter of the two daughter branches and the mother branch, to  
61 which a  $3/2$  power exponent is applied. These features are expected to reflect signal propagation dynamics  
62 along the axonal tree (30, 31).

63 To avoid biases in classification due to unequal group sizes, and to decrease simulation time we down-  
64 sampled our data to include 16 neurons in each group. These neurons were selected as the reconstructions with  
65 the highest number of diameter values measured from each group. We applied a 4-fold cross validation scheme  
66 with 1,000 repeats, and used a multinomial logistic regression approach with  $l^2$  regularization to classify the  
67 data. The resulting  $F_1$ -scores are presented in Fig. 1H.  $F_1$ -scores range between 0.702 for basket cells, and  
68 0.902 for chandelier, resulting in an average  $F_1$ -score of 0.777, based only on the axonal tree’s morphological  
69 parameters. These results are supported by the fact that chandelier cells are, indeed, the easiest cells for experts  
70 to classify manually (5). Furthermore, basket cells are heterogeneous, commonly divided into large, nest, and  
71 small basket cell subclasses (26). A noticeable similarity between the axonal trees of the double-bouquet and  
72 Martinotti cells can be seen in Fig. 1H. This resemblance supports previous studies that showed the similarity  
73 between the electrophysiological properties of these two types of neurons (32). A complement analysis of  
74 unsupervised clustering was performed on the morphological parameters for each neuron and is presented in

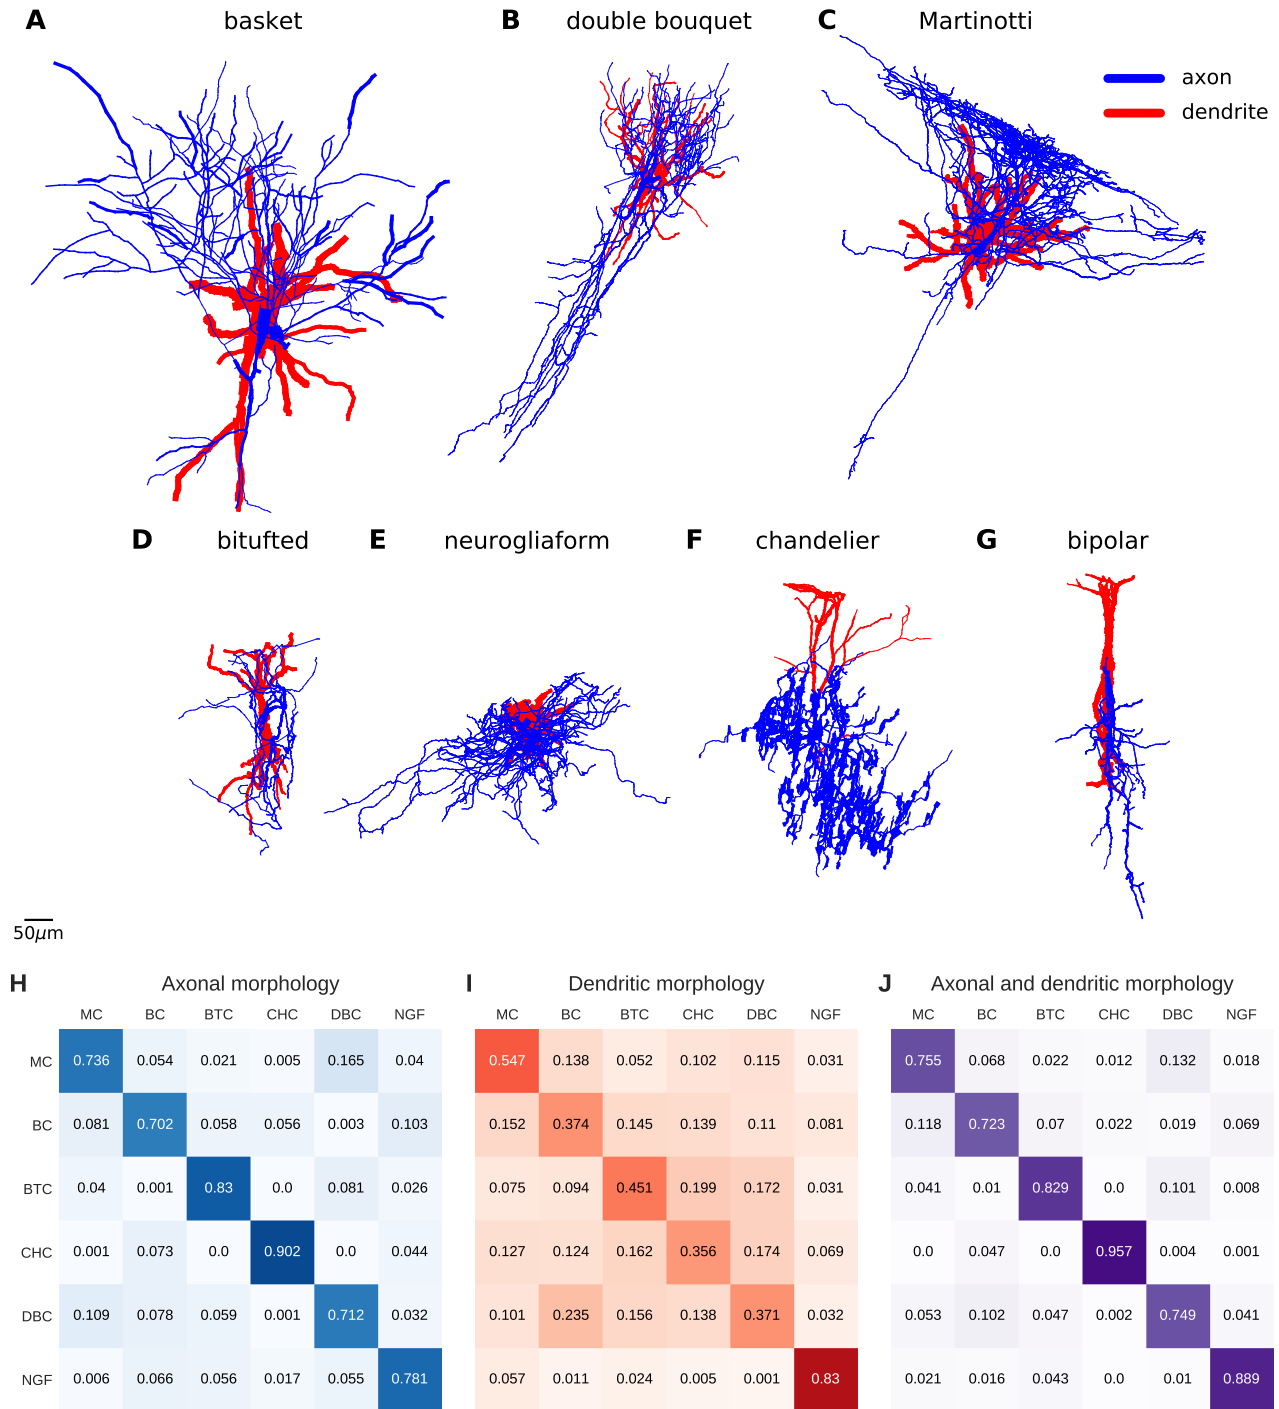

**Figure 1: Classification by morphology. Representative examples of different interneuronal types.** Line width is proportional to the axonal (blue) or dendritic (red) segment's corresponding diameter. Data are projected into the XY plane. Cells used for visualizations are as follows: **A.** NMO\_06143, **B.** NMO\_61613, **C.** NMO\_79459, **D.** NMO\_61580, **E.** NMO\_37062, **F.** NMO\_04548, and **G.** NMO\_61602.  $F_1$ -score matrices for **H.** Axonal tree morphology only (average  $F_1$ -score: 0.777), **I.** Dendritic tree morphology only (average  $F_1$ -score: 0.488), and **J.** Axonal and dendritic tree morphologies combined (average  $F_1$ -score: 0.817).

75 fig. S1.

76 To compare the above classification based on axonal tree morphology to a more common classification  
 77 based on dendritic tree morphology, we applied an analogous classification approach to the dendritic trees of  
 78 the *same* neurons. The resulting  $F_1$ -scores are presented in Fig. 1I. The dendritic tree-based classification  
 79 better detects neurogliaform cells ( $F_1$ -score of 0.83 compared to 0.356–0.547 in other cell types). This result

|    | Description                                                                                       |
|----|---------------------------------------------------------------------------------------------------|
| 1  | The number of branches                                                                            |
| 2  | Symmetry – mean of the ratio between the number of children in each daughter branch               |
| 3  | Maximum branch order                                                                              |
| 4  | Mean branch order                                                                                 |
| 5  | Difference between maximum and minimum on the x-coordinates ( $\mu m$ )                           |
| 6  | Difference between maximum and minimum on the y-coordinates ( $\mu m$ )                           |
| 7  | Difference between maximum and minimum on the z-coordinates ( $\mu m$ )                           |
| 8  | Sholl analysis – the number of branch intersections at a radius of $100\mu m$ from the soma in 3D |
| 9  | Sholl analysis – the number of branch intersections at a radius of $200\mu m$ from the soma in 3D |
| 10 | Sholl analysis – the number of branch intersections at a radius of $300\mu m$ from the soma in 3D |
| 11 | The number of branches longer than $200\mu m$                                                     |
| 12 | The number of branches longer than $300\mu m$                                                     |
| 13 | The number of branches longer than $400\mu m$                                                     |
| 14 | Maximum path length, the distance from the soma to the farther leaf ( $\mu m$ )                   |
| 15 | Minimum path length, the distance from the soma to the closer leaf ( $\mu m$ )                    |
| 16 | Mean path length, the distance from the soma to the closer leaf ( $\mu m$ )                       |
| 17 | Maximum branch length ( $\mu m$ )                                                                 |
| 18 | Mean branch length ( $\mu m$ )                                                                    |
| 19 | The total length of all branches in the axonal tree ( $\mu m$ )                                   |
| 20 | Maximum branch length divided by the square root of the branch diameter                           |
| 21 | Mean branch length divided by the square root of the branch diameter                              |
| 22 | Maximum branch diameter ( $\mu m$ )                                                               |
| 23 | Mean branch diameter ( $\mu m$ )                                                                  |
| 24 | The number of GRs above 2                                                                         |
| 25 | The number of GRs above 3                                                                         |
| 26 | The maximum GR value of all branching points                                                      |
| 27 | The mean GR value of all branching points                                                         |
| 28 | The percentage the of bifurcations with GR above 2                                                |

**Table 2: Morphological features of the axonal tree.**

80 agrees with the observation that neurogliaform cells are known for their thinness and abundance of radiating  
81 dendrites (33). In fact, of the six cell types, this is the only case in which the dendritic tree-based classification  
82 performs better than the axonal tree-based classification ( $F_1$ -score of 0.83 compared to 0.781). Interestingly,  
83 the dendritic tree-based classification performs poorly on chandelier cells ( $F_1$ -score of 0.356), in contrast to  
84 the axonal tree-based classification, that classifies these cells with a very high success rate ( $F_1$ -score of 0.902).  
85 Note that bitufted cells are better differentiated by the axonal tree, even though their name was coined due to  
86 their dendritic tree structure.

87 We next combined axonal and dendritic tree morphology parameters and applied the same classification  
88 scheme as before. This resulted in an improved classification performance: the average  $F_1$ -score increased  
89 from 0.777 for axonal trees only and 0.488 for dendritic trees only to 0.817 for the two combined (Fig. 1J).

90 The fitted classification models allow us to quantify the contribution of each feature to the classification  
91 (fig. S2). For example, neurogliaform cells are characterized by symmetrical topology, high Sholl values at  
92  $100\mu m$ , and high values of mean GR of the axonal tree. In the dendritic tree, however, they are characterized  
93 by low values of mean GR. In contrast, Martinotti cells have low values of the mean GR in the axonal tree.  
94 Bitufted cells have high values of mean branch length and mean branch length divided by the square root of  
95 diameter; Chandelier cells are characterized by high values of the maximum dendritic branch length and the  
96 maximum path length.

## 97 **Classification of interneuron types by signal propagation dynamics**

98 To study signal propagation dynamics, we measured the response to current stimulus pulses injected into the  
99 soma at various frequencies along the axonal tree. Figure 2 shows an example of simulated neuronal activity  
100 along axonal branches of a basket cell. In this example, we used the membrane properties of the ‘continuous  
101 non-accommodating’ (cNAC) e-type, obtained from the BBP repertoire to simulate signal propagation. In  
102 the soma, all the stimulus pulses lead to action potential (denoted as ‘1’), and in the other probed locations  
103 intermittent trains occur (denoted as ‘2–4’).

104 Figure 3 shows the electrical response along the axonal tree for different stimulus frequencies for the cNAC  
105 e-type. At  $200Hz$  (Fig. 3A) the axonal tree is split into two subtrees, each exhibits a different firing pattern,  
106 in particular, an uninterrupted train and a ‘1:1’ pattern in which every other pulse propagates. For a stimulus

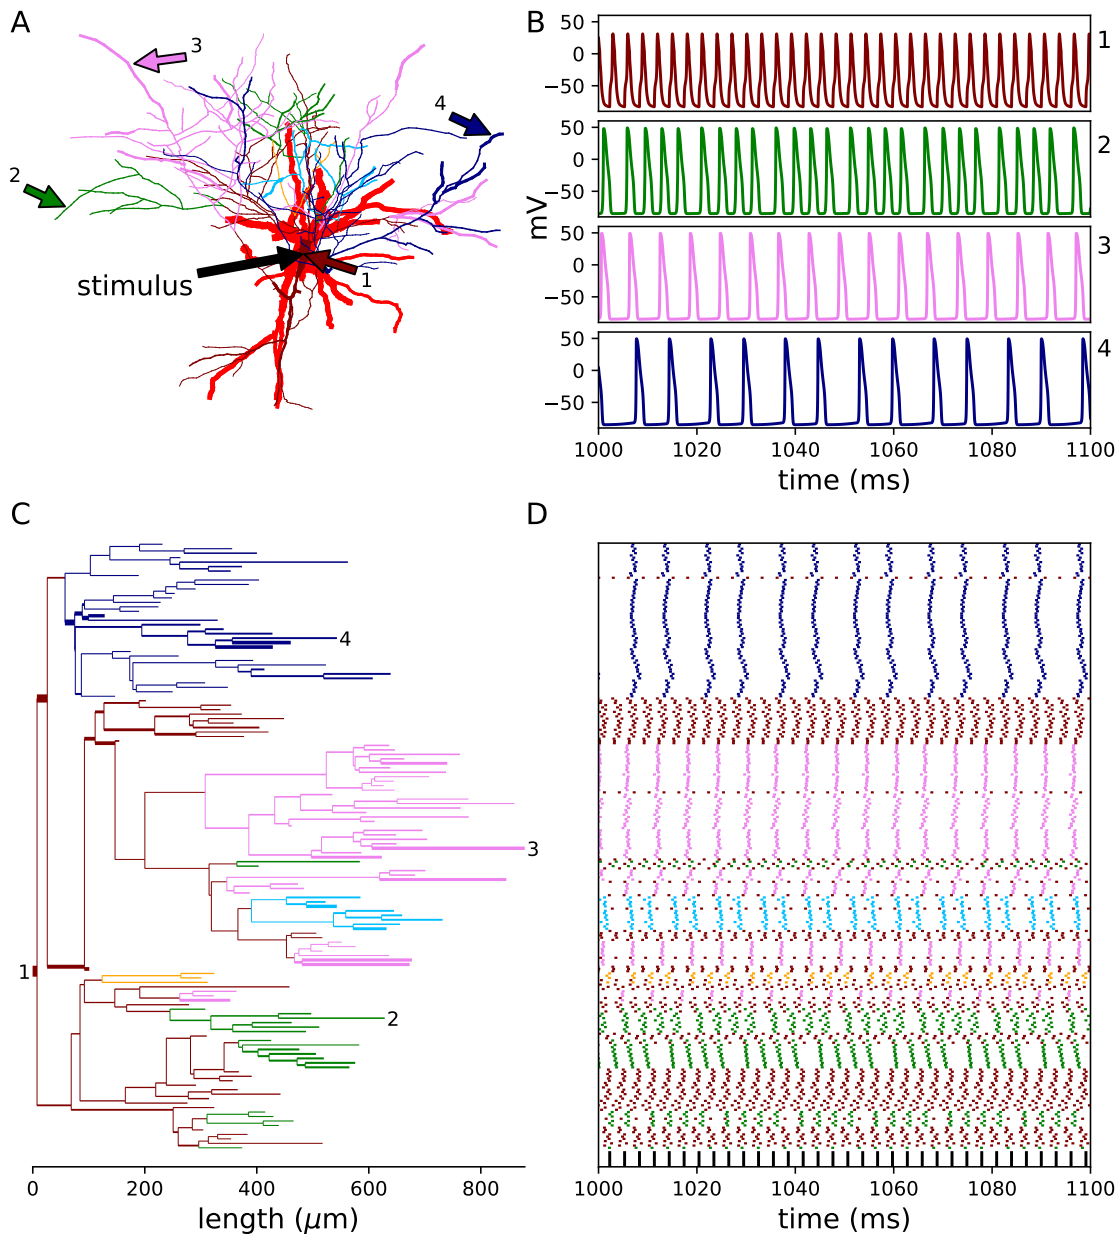

**Figure 2: Activity recorded along the axonal tree.** **A.** An XY projection for a basket cell (NMO\_06143). The arrows indicate the location in which the stimulus is induced and the locations in which the propagated signal is recorded. Dendrites are in red, and the axonal branches are colored according to the firing pattern response. **B.** An example of firing patterns in four different locations. Panels 1–4 (indicated in the top right part of each panel) correspond to the arrows shown in (A). **C.** Axonogram: a dendrogram-like graph of the axonal tree only. Horizontal line widths indicate axonal diameters. **D.** Raster plot of the electrical activity; each row represents the activity at the corresponding (same height) axonal branch in (C). Line color indicates the fraction of spike train that propagates: maroon – 1, orange – 0.75, deep sky blue – 0.66, violet – 0.5, and navy – 0.375. Black squares on the bottom row indicate the current pulses applied to the soma ( $330\text{Hz}$ ). The response to the first  $1,000\text{ms}$  is not shown, to rule out the influence of the initial condition.

107 frequency of  $300\text{Hz}$  (Fig. 3B), there are 8 subtrees with three different response types, and at  $400\text{Hz}$  (Fig. 3C),  
 108 there are 23 subtrees with five different response types. We counted the number of subtrees as a function of  
 109 stimulus frequency (Figure 3D), and obtained a characteristic curve that will be used for the classification. In  
 110 addition to the cNAC, we generated three other curves from the cAC, bNAC, and bAC e-types. The decision  
 111 to focus on these e-types resulted from an analysis that showed a high degree of propagating signal similarity  
 112 between e-types (see fig. S3).

113 We then tested the possibility of using neuronal activity signatures to classify interneuron types. To this  
 114 end, we have engineered activity-based features from Hill diversity indexes (see Methods). Figure S4 shows



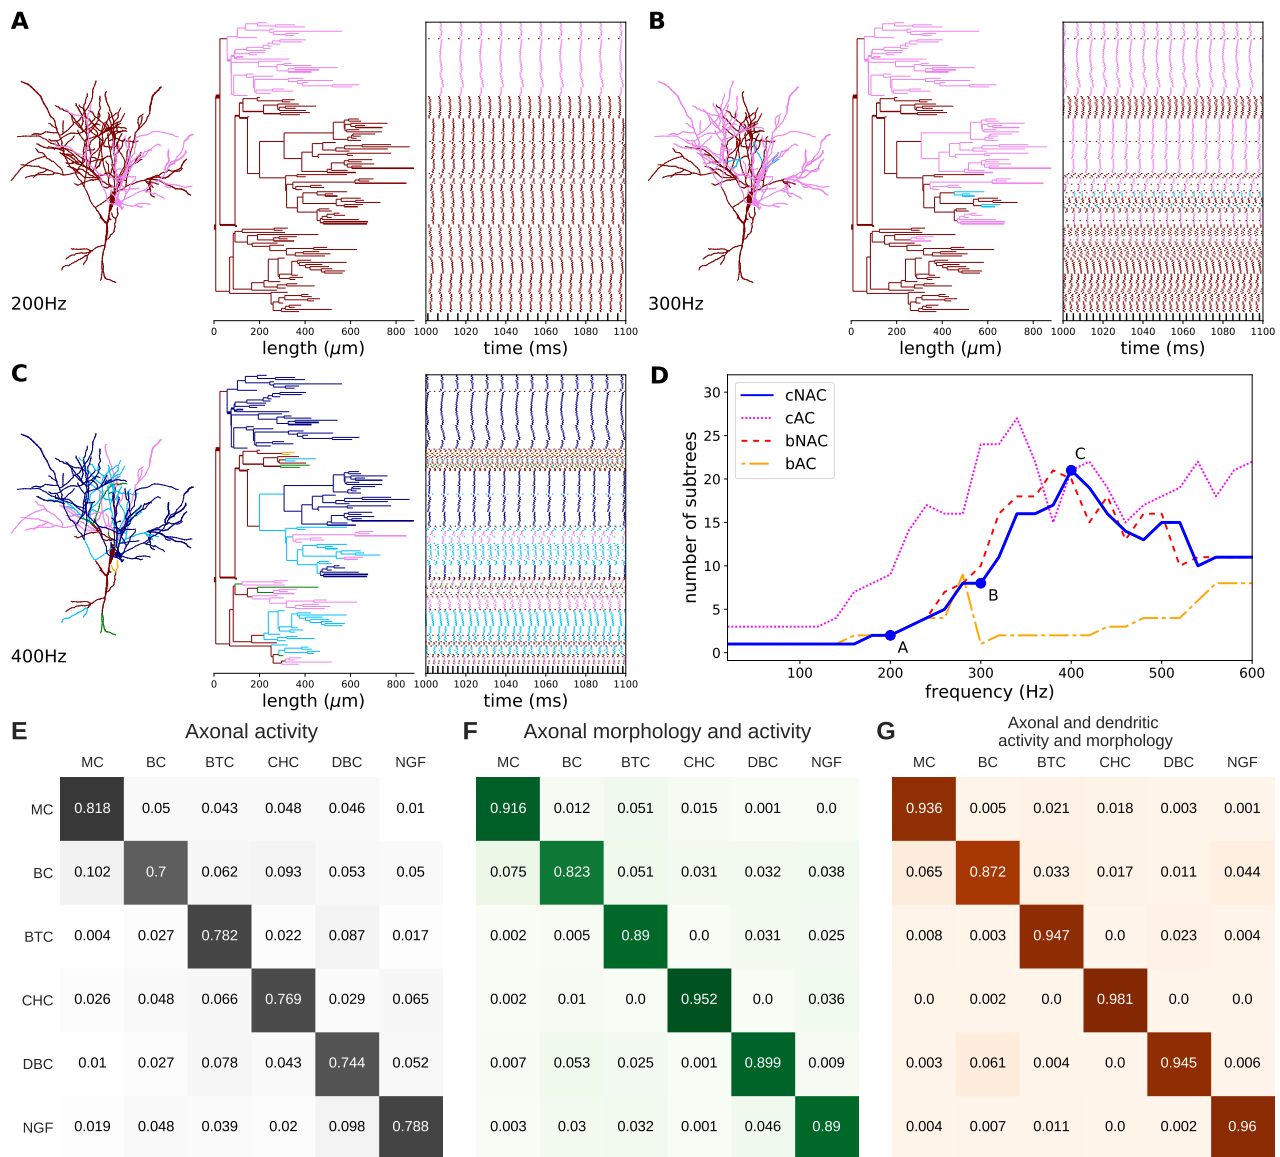

**Figure 3: Effects of stimulus frequency on the signal propagation dynamics.** Axonograms showing the responses of the same interneuron (as in Fig. 2) to three stimulus frequencies are presented in **A**. (200Hz), **B**. (300Hz), and **C**. (400Hz). **D**. The number of subtrees as a function of stimulus frequency. The dots (marked in ‘A’, ‘B’, and ‘C’) correspond to the scenarios presented in (A), (B), and (C).  $F_1$ -score matrices for **E**. Activity only (average  $F_1$ -score: 0.767), **F**. Axonal morphology and activity combined (average  $F_1$ -score: 0.895), and **G**. Axonal and dendritic morphology and activity combined (average  $F_1$ -score: 0.94).

115 the mean and standard deviation of the  $q = 0$  diversity index as a function of the stimulus frequency. Note  
 116 that for  $q = 0$ , the diversity index is equal to the number of subtrees. Similar to the morphology-based  
 117 classification, we used multinomial logistic regression, and assessed it with a 4-fold cross validation scheme  
 118 with 1,000 repeats. Figures 3E presents the classification results based on the axonal tree activity (an average  
 119  $F_1$ -score of 0.767). Combining axonal morphology (Fig. 1H) with axonal tree activity (Fig. 3E) improves the  
 120 classification’s average  $F_1$ -score from 0.777 and 0.767 to 0.895 (Fig. 3F). Including the morphology of the  
 121 dendritic tree as well resulted in an average  $F_1$ -score of 0.94 (Fig 3G). The classification model results for each  
 122 neuron are presented in Table S1.

## 123 Discussion

124 Numerous studies published in recent years used a variety of approaches to classify neurons. Standard classifica-  
 125 tion approaches are based on morphology. In particular, they utilize soma position, dendritic geometry, gen-  
 126 eral axonal projections, and connectivity features (4). Here we used the axonal tree morphology for interneuron  
 127 classification, resulting in better results compared with classification based on the dendritic tree morphology.

128 Combining axonal tree morphology with dendritic tree morphology and activity patterns further improved the  
129 classification results. For the data analyzed here, the average  $F_1$ -score changed from 0.777 for axonal trees  
130 and 0.488 for dendritic trees to 0.817 for the two combined. Combining also the activity patterns significantly  
131 improved the  $F_1$ -score to 0.94.

132 Interneuron subtypes are known to shape the electrophysiological activity dynamics (34). Therefore, the  
133 use of activity-based features as classifiers is important (35). Teeter *et al.* used simple generalized leaky  
134 integrate-and-fire point neuron models to classify transgenic lines (36). Previous studies have also shown  
135 how dendritic tree geometry affects the electrical activity in neurons. It was demonstrated that in activity  
136 simulations taking into account the dendritic tree morphology, rather than a point neuron, can capture local  
137 non-linear effects (37). In this study, we used realistic neuronal morphologies and dynamics for classification  
138 of interneurons. To this end, the soma was stimulated with a wide range of current pulses frequencies, since  
139 it was shown that high-frequency trains may exist in fast-spiking neurons and in bursting (38, 39). Then, we  
140 recorded the simulated activity along each branch of the axonal tree, and not only at the soma. This revealed  
141 diverse response patterns already at the single neuron level. Importantly, we showed that these firing patterns  
142 can be used to classify interneurons into their known subtypes. Our results indicate that it is beneficial for  
143 modeling signal propagation dynamics to include the full biophysical neuronal structure including the axonal  
144 tree. In particular, precise measurements of neuronal processes were shown here to strongly affect simulation  
145 results in single neuron models. In the future, advanced imaging tools may be used to explore the activity along  
146 the axonal tree in real neurons. This will allow to study the effects of geometry on the accuracy of activity  
147 simulations.

148 Due to the lack of accepted nomenclature and no complete agreement between experts, the labels given by  
149 a specific lab, provided by *NeuroMorpho.Org*, are prone to errors. It can be seen in table S1 and in fig. S1,  
150 that there are neurons that evidently belong to a different type than the one tagged by *NeuroMorpho.Org* (e.g.,  
151 NMO\_37137 and NMO\_61618). Discarding these neurons may further improve classification results. Despite  
152 tremendous progress in imaging and reconstruction techniques, the amount of quality data is not sufficient.  
153 More data of high-resolution reconstructions from diverse sources are of utmost importance for more compre-  
154 hensive species dependent neuron classification. When such additional data become available, neurons of rats,  
155 mice, and humans, from different brain regions and layers, could be independently classified. The electrical  
156 membrane properties of the reconstructions used here, were fitted by the BBP to the soma, dendrites, and the  
157 axon initial segment, and do not include the entire axonal tree, axonal boutons, and myelin sheath (26). Nev-  
158 ertheless, these properties resemble a close approximation of an actual mechanism, and yielded an excellent  
159 classifications. Fitting the electrical membrane properties along all the axonal tree, can further improve our  
160 understanding of signal propagation in neurons.

161 Classifying neurons into subtypes is debatable; it is not yet clear that neurons can be described by a set  
162 of distinct classes or should they be treated as a continuum of phenotypes (18). The approach used here of  
163 combining dendritic and axonal tree morphologies with activity patterns can be utilized in an unsupervised  
164 fashion to examine the clusters of subtypes without prior assumptions. This investigation will also advance  
165 standardization toward consensus regarding neuronal type nomenclature.

## 166 **Materials and Methods**

### 167 **Simulations**

168 Digitally reconstructed neurons were downloaded from *NeuroMorpho.Org* version 7.4 (28). All reconstructions  
169 were produced in the same staining method, by bright-field images of biocytin filled neurons. Each neuron's  
170 reconstructed data is stored in an SWC file. We used the notation of branch to describe an axonal section  
171 between two branching points, or between a branching point and a termination point (leaf), and a segment to  
172 describe a small compartment in 3D space. Several successive segments were used to construct a branch. The  
173 SWC files were imported into *NEURON* simulation using the *Import3D* tool, which converts all the segments of  
174 each branch into equivalent diameter cables. The neuronal activity simulations were conducted using *NEURON*  
175 simulation environment version 7.5 embedded in Python 2.7.13 (40). The same version of Python was used for  
176 all other analyses presented here.

## 177 Membrane electrical properties

178 To simulate signal propagation dynamics, ion channel mechanisms with different densities were introduced into  
179 the reconstructed neurons. For realistic modeling, we used membrane properties borrowed from the BBP (26).  
180 These e-types were fitted to experiments produced in the cortex neurons of Wistar (Han) rats at a temperature  
181 of  $34^{\circ}C$ . Each e-type is constructed from specific ion channel types with varying densities at the soma, axons,  
182 and basal and apical dendrites. Details of the ion channels, their kinetics, and other parameters can be found in  
183 the NMC portal (25) and in the attached files there. The specific equations and parameters used here were taken  
184 from the following reconstructions: L23\_LBC\_cNAC187\_5, L23\_DBC\_cACint209\_1, L23\_LBC\_bNAC219\_1,  
185 L5\_LBC\_bAC217\_4, and L5\_STPC\_cADpyr.

186 Current pulses were stimulated in the soma, with an amplitude of  $20\mu A$  and a duration of  $1ms$ , for a range  
187 of frequencies. Electrical responses were recorded at the center of each axonal branch. For the raster plots (e.g.,  
188 Fig. 2D), a spike was defined when the voltage peak amplitude exceeded a zero voltage threshold. Voltage peaks  
189 that were separated by less than  $1ms$  were discarded to avoid discretization errors.

## 190 Classification

191 Supervised classification was performed using multinomial logistic regression. We used the *LogisticRegression*  
192 function from the *Scikit-learn* python library, with an  $l^2$  regularization penalty. For the classification, 1,000  
193 4-fold cross validation repeats were produced, i.e., 1,000 choices of 75% of the data for training and 25% for  
194 testing the model. All morphological parameters were first log-transformed, and then standardized for this  
195 classification. The parameters for both the training and test sets were standardized according to the mean  
196 and standard deviation of the training set. Feature selection was performed in a recursive way where in each  
197 iteration, the worst feature of each neuronal type was discarded, to achieve the optimize features for the final  
198 model. Sensitivity was calculated by normalizing each value in the confusion matrix by the sum of the row to  
199 which it belongs. Precision was calculated similarly but normalization was done according to the column of  
200 the confusion matrix.  $F_1$ -score is defined as the harmonic average of sensitivity and precision (Equation 1).

$$F_1 = 2 \times \frac{\text{precision} \times \text{sensitivity}}{\text{precision} + \text{sensitivity}} \quad (1)$$

201 For activity-based classification, the Hill diversity index (Equation 2) was calculated as a function of frequency  
202 for each interneuron type. The Hill diversity index was calculated for  $q \in \{0, 1\}$ , for four e-types, and two  
203 definitions of a subgroup: 1. A subtree with an identical response, and 2. A set of branches with an identical  
204 response (possibly in more than one subtree). The Hill diversity index is defined as

$${}^qD = \left( \sum_{i=1}^R P_i^q \right)^{1/(1-q)} \quad (2)$$

205 where  $R$  is the number of groups (“species” according to its original definition), and  $P_i$  is the normalized  
206 number of members in each group.  ${}^0D$  equals the number of groups, and  ${}^1D$  converges to the exponent of  
207 Shanon Entropy (Equation 3).

$${}^1D = \exp\left( - \sum_{i=1}^R P_i \ln(p_i) \right) \quad (3)$$

## 208 Code availability

209 The code for the models and simulations is publicly available on Github:  
210 [https://github.com/NetanelOfer/Axonal\\_tree\\_classification](https://github.com/NetanelOfer/Axonal_tree_classification).

## 211 Supplementary Materials

212 Table S1. Detailed confusion matrix.

213 Fig. S1. A heatmap comparing the distributions of morphological parameters.

214 Fig. S2. Logistic regression coefficients.

215 Fig. S3. Comparison between 10 e-types from the BBP.

216 Fig. S4. Axonal response characterized by diversity index as a function of stimulus frequency.



## References

1. Harris KD, Shepherd GM. The neocortical circuit: themes and variations. *Nature neuroscience*. 2015;18(2):170.
2. Tremblay R, Lee S, Rudy B. GABAergic interneurons in the neocortex: from cellular properties to circuits. *Neuron*. 2016;91(2):260–292.
3. Armañanzas R, Ascoli GA. Towards the automatic classification of neurons. *Trends in neurosciences*. 2015;38(5):307–318.
4. Zeng H, Sanes JR. Neuronal cell-type classification: challenges, opportunities and the path forward. *Nature Reviews Neuroscience*. 2017;18(9):530.
5. DeFelipe J, López-Cruz PL, Benavides-Piccione R, Bielza C, Larrañaga P, Anderson S, et al. New insights into the classification and nomenclature of cortical GABAergic interneurons. *Nature Reviews Neuroscience*. 2013;14(3):202.
6. Druckmann S, Hill S, Schürmann F, Markram H, Segev I. A hierarchical structure of cortical interneuron electrical diversity revealed by automated statistical analysis. *Cerebral Cortex*. 2012;23(12):2994–3006.
7. Ferrante M, Tahvildari B, Duque A, Hadzipasic M, Salkoff D, Zaghera EW, et al. Distinct functional groups emerge from the intrinsic properties of molecularly identified entorhinal interneurons and principal cells. *Cerebral Cortex*. 2016;27(6):3186–3207.
8. Jiang X, Shen S, Cadwell CR, Berens P, Sinz F, Ecker AS, et al. Principles of connectivity among morphologically defined cell types in adult neocortex. *Science*. 2015;350(6264):aac9462.
9. Kepecs A, Fishell G. Interneuron cell types are fit to function. *Nature*. 2014;505(7483):318–326.
10. Zeisel A, Muñoz-Manchado AB, Codeluppi S, Lönnerberg P, La Manno G, Juréus A, et al. Cell types in the mouse cortex and hippocampus revealed by single-cell RNA-seq. *Science*. 2015;347(6226):1138–1142.
11. Tasic B, Menon V, Nguyen TN, Kim TK, Jarsky T, Yao Z, et al. Adult mouse cortical cell taxonomy revealed by single cell transcriptomics. *Nature neuroscience*. 2016;19(2):335–346.
12. Luo C, Keown CL, Kurihara L, Zhou J, He Y, Li J, et al. Single-cell methylomes identify neuronal subtypes and regulatory elements in mammalian cortex. *Science*. 2017;357(6351):600–604.
13. Chevée M, Robertson JDJ, Cannon GH, Brown SP, Goff LA. Variation in Activity State, Axonal Projection, and Position Define the Transcriptional Identity of Individual Neocortical Projection Neurons. *Cell Reports*. 2018;22(2):441–455.
14. Helmstaedter M, Sakmann B, Feldmeyer D. The relation between dendritic geometry, electrical excitability, and axonal projections of L2/3 interneurons in rat barrel cortex. *Cerebral Cortex*. 2008;19(4):938–950.
15. Papoutsi A, Kastellakis G, Poirazi P. Basal tree complexity shapes functional pathways in the prefrontal cortex. *Journal of Neurophysiology*. 2017;118(4):1970–1983.
16. Gouwens NW, Sorensen SA, Berg J, Lee C, Jarsky T, Ting J, et al. Classification of electrophysiological and morphological types in mouse visual cortex. *bioRxiv*. 2018;doi:10.1101/368456.
17. Mihaljević B, Larrañaga P, Benavides-Piccione R, Hill S, DeFelipe J, Bielza C. Towards a supervised classification of neocortical interneuron morphologies. *BMC bioinformatics*. 2018;19(1):511.
18. Dumitriu D, Cossart R, Huang J, Yuste R. Correlation between axonal morphologies and synaptic input kinetics of interneurons from mouse visual cortex. *Cerebral cortex*. 2006;17(1):81–91.
19. Hernández-Pérez LA, Delgado-Castillo D, Martín-Pérez R, Orozco-Morales R, Lorenzo-Ginori JV. New Features for Neuron Classification. *Neuroinformatics*. 2018; p. 1–21.

20. Kanari L, Ramaswamy S, Shi Y, Morand S, Meystre J, Perin R, et al. Objective Morphological Classification of Neocortical Pyramidal Cells. *Cerebral Cortex*. 2019;.
21. Gillette TA, Ascoli GA. Topological characterization of neuronal arbor morphology via sequence representation: I-motif analysis. *BMC bioinformatics*. 2015;16(1):216.
22. Wan Y, Long F, Qu L, Xiao H, Hawrylycz M, Myers EW, et al. BlastNeuron for automated comparison, retrieval and clustering of 3D neuron morphologies. *Neuroinformatics*. 2015;13(4):487–499.
23. Li T, Tian C, Scalmani P, Frassoni C, Mantegazza M, Wang Y, et al. Action potential initiation in neocortical inhibitory interneurons. *PLoS biology*. 2014;12(9):e1001944.
24. Casale AE, Foust AJ, Bal T, McCormick DA. Cortical interneuron subtypes vary in their axonal action potential properties. *Journal of Neuroscience*. 2015;35(47):15555–15567.
25. Ramaswamy S, Courcol JD, Abdellah M, Adaszewski SR, Antille N, Arsever S, et al. The neocortical microcircuit collaboration portal: a resource for rat somatosensory cortex. *Frontiers in neural circuits*. 2015;9.
26. Markram H, Muller E, Ramaswamy S, Reimann MW, Abdellah M, Sanchez CA, et al. Reconstruction and simulation of neocortical microcircuitry. *Cell*. 2015;163(2):456–492.
27. Gouwens NW, Berg J, Feng D, Sorensen SA, Zeng H, Hawrylycz MJ, et al. Systematic generation of biophysically detailed models for diverse cortical neuron types. *Nature communications*. 2018;9(1):710.
28. Akram MA, Nanda S, Maraver P, Armañanzas R, Ascoli GA. An open repository for single-cell reconstructions of the brain forest. *Scientific data*. 2018;5:180006.
29. Feldmeyer D, Qi G, Emmenegger V, Staiger JF. Inhibitory interneurons and their circuit motifs in the many layers of the barrel cortex. *Neuroscience*. 2018;368:132–151.
30. Ofer N, Shefi O. Axonal geometry as a tool for modulating firing patterns. *Applied Mathematical Modelling*. 2016;40(4):3175–3184.
31. Ofer N, Shefi O, Yaari G. Branching morphology determines signal propagation dynamics in neurons. *Scientific Reports*. 2017;7.
32. Krimer LS, Zaitsev AV, Czanner G, Kroner S, González-Burgos G, Povysheva NV, et al. Cluster analysis-based physiological classification and morphological properties of inhibitory neurons in layers 2–3 of monkey dorsolateral prefrontal cortex. *Journal of neurophysiology*. 2005;94(5):3009–3022.
33. Overstreet-Wadiche L, McBain CJ. Neurogliaform cells in cortical circuits. *Nature Reviews Neuroscience*. 2015;16(8):458.
34. Chen G, Zhang Y, Li X, Zhao X, Ye Q, Lin Y, et al. Distinct Inhibitory Circuits Orchestrate Cortical beta and gamma Band Oscillations. *Neuron*. 2017;96(6):1403–1418.
35. Emmenegger V, Qi G, Wang H, Feldmeyer D. Morphological and Functional Characterization of Non-fast-Spiking GABAergic Interneurons in Layer 4 Microcircuitry of Rat Barrel Cortex. *Cerebral Cortex*. 2018;.
36. Teeter C, Iyer R, Menon V, Gouwens N, Feng D, Berg J, et al. Generalized leaky integrate-and-fire models classify multiple neuron types. *Nature communications*. 2018;9(1):709.
37. Bono J, Wilmes KA, Clopath C. Modelling plasticity in dendrites: from single cells to networks. *Current opinion in neurobiology*. 2017;46:136–141.
38. Wang B, Ke W, Guang J, Chen G, Yin L, Deng S, et al. Firing Frequency Maxima of Fast-Spiking Neurons in Human, Monkey, and Mouse Neocortex. *Frontiers in cellular neuroscience*. 2016;10.

39. Eyal G, Mansvelder HD, de Kock CP, Segev I. Dendrites impact the encoding capabilities of the axon. *Journal of Neuroscience*. 2014;34(24):8063–8071.
40. Hines ML, Davison AP, Muller E. NEURON and Python. *Frontiers in neuroinformatics*. 2009;3.

# Axonal tree morphology and signal propagation dynamics improve interneuron classification

Netanel Ofer<sup>1,2</sup>, Orit Shefi<sup>1,2,\*</sup>, and Gur Yaari<sup>1,\*</sup>

<sup>1</sup>Faculty of Engineering, Bar Ilan University, Ramat Gan 5290002, Israel.

<sup>2</sup>Bar Ilan Institute of Nanotechnologies and Advanced Materials, Bar Ilan University, Ramat Gan 5290002, Israel.

## **Supplementary material**

| Type           | NMO           | MC        | BC  | BTC | CHC | DBC | NGF |
|----------------|---------------|-----------|-----|-----|-----|-----|-----|
| Martinotti     | NMO_06140     | 250       | 4   | 0   | 0   | 0   | 0   |
|                | NMO_36965     | 194       | 0   | 0   | 56  | 1   | 0   |
|                | NMO_37190     | 245       | 2   | 2   | 0   | 3   | 1   |
|                | NMO_37290     | 202       | 0   | 38  | 17  | 0   | 0   |
|                | NMO_37291     | 256       | 0   | 0   | 0   | 0   | 0   |
|                | NMO_37297     | 235       | 0   | 0   | 0   | 0   | 0   |
|                | NMO_37301     | 233       | 5   | 0   | 0   | 0   | 0   |
|                | NMO_37672     | 269       | 0   | 0   | 0   | 0   | 0   |
|                | NMO_37787     | 201       | 3   | 47  | 0   | 0   | 2   |
|                | NMO_79457     | 213       | 0   | 0   | 0   | 0   | 0   |
|                | NMO_79458     | 269       | 0   | 0   | 0   | 0   | 0   |
|                | NMO_79459     | 245       | 0   | 0   | 0   | 0   | 0   |
|                | NMO_79462     | 270       | 4   | 0   | 0   | 0   | 0   |
|                | NMO_79463     | 230       | 0   | 0   | 0   | 8   | 0   |
|                | NMO_79464     | 236       | 0   | 0   | 0   | 0   | 0   |
|                | NMO_79465     | 260       | 0   | 0   | 0   | 0   | 0   |
|                | basket        | NMO_06143 | 1   | 236 | 0   | 0   | 0   |
| NMO_37015      |               | 0         | 268 | 0   | 5   | 0   | 0   |
| NMO_37112      |               | 2         | 227 | 0   | 1   | 5   | 0   |
| NMO_37117      |               | 129       | 108 | 2   | 7   | 2   | 9   |
| NMO_37137      |               | 0         | 73  | 0   | 30  | 4   | 151 |
| NMO_37188      |               | 0         | 203 | 30  | 0   | 15  | 0   |
| NMO_37310      |               | 0         | 254 | 0   | 0   | 0   | 0   |
| NMO_37311      |               | 2         | 287 | 0   | 1   | 0   | 0   |
| NMO_37504      |               | 0         | 248 | 0   | 0   | 0   | 1   |
| NMO_37505      |               | 0         | 232 | 0   | 0   | 1   | 15  |
| NMO_37529      |               | 15        | 207 | 0   | 24  | 0   | 0   |
| NMO_37841      |               | 0         | 232 | 0   | 0   | 1   | 0   |
| NMO_37844      |               | 0         | 148 | 101 | 0   | 7   | 0   |
| NMO_37862      |               | 2         | 260 | 0   | 0   | 6   | 1   |
| NMO_79468      |               | 96        | 159 | 0   | 0   | 1   | 0   |
| NMO_79469      |               | 17        | 212 | 0   | 0   | 0   | 0   |
| bitufted       |               | NMO_37096 | 0   | 0   | 250 | 0   | 0   |
|                | NMO_37099     | 0         | 0   | 254 | 0   | 0   | 0   |
|                | NMO_37110     | 0         | 0   | 256 | 0   | 0   | 0   |
|                | NMO_37127     | 0         | 0   | 255 | 0   | 2   | 0   |
|                | NMO_37244     | 0         | 3   | 260 | 0   | 0   | 0   |
|                | NMO_37296     | 0         | 0   | 254 | 0   | 0   | 0   |
|                | NMO_37302     | 0         | 0   | 243 | 0   | 0   | 0   |
|                | NMO_37316     | 0         | 0   | 252 | 0   | 0   | 0   |
|                | NMO_37324     | 0         | 0   | 244 | 0   | 0   | 0   |
|                | NMO_37385     | 0         | 0   | 267 | 0   | 0   | 0   |
|                | NMO_37691     | 0         | 0   | 241 | 0   | 1   | 0   |
|                | NMO_37704     | 0         | 0   | 260 | 0   | 0   | 0   |
|                | NMO_37776     | 0         | 0   | 236 | 0   | 0   | 0   |
|                | NMO_37781     | 0         | 0   | 226 | 0   | 0   | 0   |
|                | NMO_61570     | 34        | 4   | 198 | 0   | 3   | 0   |
|                | NMO_61580     | 0         | 5   | 152 | 0   | 84  | 17  |
|                | chandelier    | NMO_04548 | 0   | 0   | 0   | 241 | 0   |
| NMO_07472      |               | 0         | 0   | 0   | 249 | 0   | 0   |
| NMO_35831      |               | 0         | 0   | 0   | 248 | 0   | 0   |
| NMO_36983      |               | 0         | 0   | 0   | 261 | 0   | 0   |
| NMO_37114      |               | 1         | 0   | 0   | 245 | 1   | 0   |
| NMO_37133      |               | 0         | 4   | 0   | 249 | 0   | 0   |
| NMO_37138      |               | 0         | 0   | 0   | 264 | 0   | 0   |
| NMO_37247      |               | 0         | 1   | 0   | 279 | 0   | 0   |
| NMO_37391      |               | 0         | 0   | 0   | 244 | 0   | 0   |
| NMO_37424      |               | 0         | 0   | 0   | 235 | 0   | 0   |
| NMO_37537      |               | 0         | 0   | 0   | 255 | 0   | 0   |
| NMO_37548      |               | 0         | 4   | 0   | 240 | 0   | 0   |
| NMO_37763      |               | 0         | 0   | 0   | 236 | 0   | 0   |
| NMO_37764      |               | 0         | 0   | 0   | 240 | 0   | 0   |
| NMO_37818      |               | 0         | 0   | 0   | 245 | 0   | 0   |
| NMO_37821      |               | 0         | 0   | 0   | 261 | 0   | 0   |
| double-bouquet |               | NMO_37148 | 0   | 0   | 3   | 0   | 264 |
|                | NMO_37171     | 0         | 0   | 5   | 0   | 237 | 0   |
|                | NMO_37178     | 0         | 0   | 0   | 1   | 252 | 0   |
|                | NMO_37184     | 0         | 0   | 1   | 0   | 240 | 0   |
|                | NMO_37363     | 0         | 0   | 0   | 0   | 248 | 0   |
|                | NMO_37422     | 1         | 0   | 0   | 0   | 256 | 0   |
|                | NMO_37423     | 0         | 0   | 0   | 0   | 243 | 0   |
|                | NMO_37469     | 0         | 0   | 0   | 0   | 260 | 0   |
|                | NMO_37475     | 0         | 30  | 0   | 1   | 228 | 0   |
|                | NMO_37694     | 0         | 0   | 0   | 0   | 264 | 0   |
|                | NMO_37695     | 0         | 0   | 1   | 0   | 263 | 0   |
|                | NMO_37699     | 0         | 0   | 0   | 0   | 263 | 0   |
|                | NMO_37724     | 0         | 1   | 2   | 0   | 245 | 17  |
|                | NMO_37762     | 0         | 0   | 0   | 0   | 248 | 0   |
|                | NMO_61613     | 3         | 42  | 0   | 0   | 207 | 0   |
|                | NMO_61618     | 9         | 161 | 3   | 0   | 63  | 3   |
|                | neurogliaform | NMO_06138 | 0   | 0   | 0   | 0   | 0   |
| NMO_06139      |               | 14        | 23  | 22  | 0   | 0   | 191 |
| NMO_37059      |               | 0         | 0   | 20  | 0   | 0   | 222 |
| NMO_37061      |               | 0         | 0   | 0   | 0   | 0   | 271 |
| NMO_37062      |               | 0         | 0   | 0   | 0   | 0   | 244 |
| NMO_37063      |               | 0         | 0   | 0   | 0   | 0   | 252 |
| NMO_37075      |               | 0         | 0   | 0   | 0   | 0   | 266 |
| NMO_37076      |               | 0         | 0   | 0   | 0   | 0   | 230 |
| NMO_37243      |               | 0         | 0   | 0   | 0   | 0   | 234 |
| NMO_37517      |               | 0         | 0   | 0   | 0   | 0   | 237 |
| NMO_37623      |               | 0         | 0   | 0   | 0   | 2   | 273 |
| NMO_37625      |               | 0         | 0   | 0   | 0   | 0   | 244 |
| NMO_37640      |               | 0         | 0   | 3   | 0   | 0   | 250 |
| NMO_37661      |               | 0         | 0   | 0   | 0   | 7   | 251 |
| NMO_37720      |               | 1         | 2   | 1   | 1   | 0   | 226 |
| NMO_37721      |               | 0         | 3   | 0   | 0   | 0   | 240 |

**Table S1: Detailed confusion matrix.** The results of the classification based on the axonal and dendritic morphology and activity (an elaboration of Fig. 3G). The maximum number in each row is indicated by blue background.



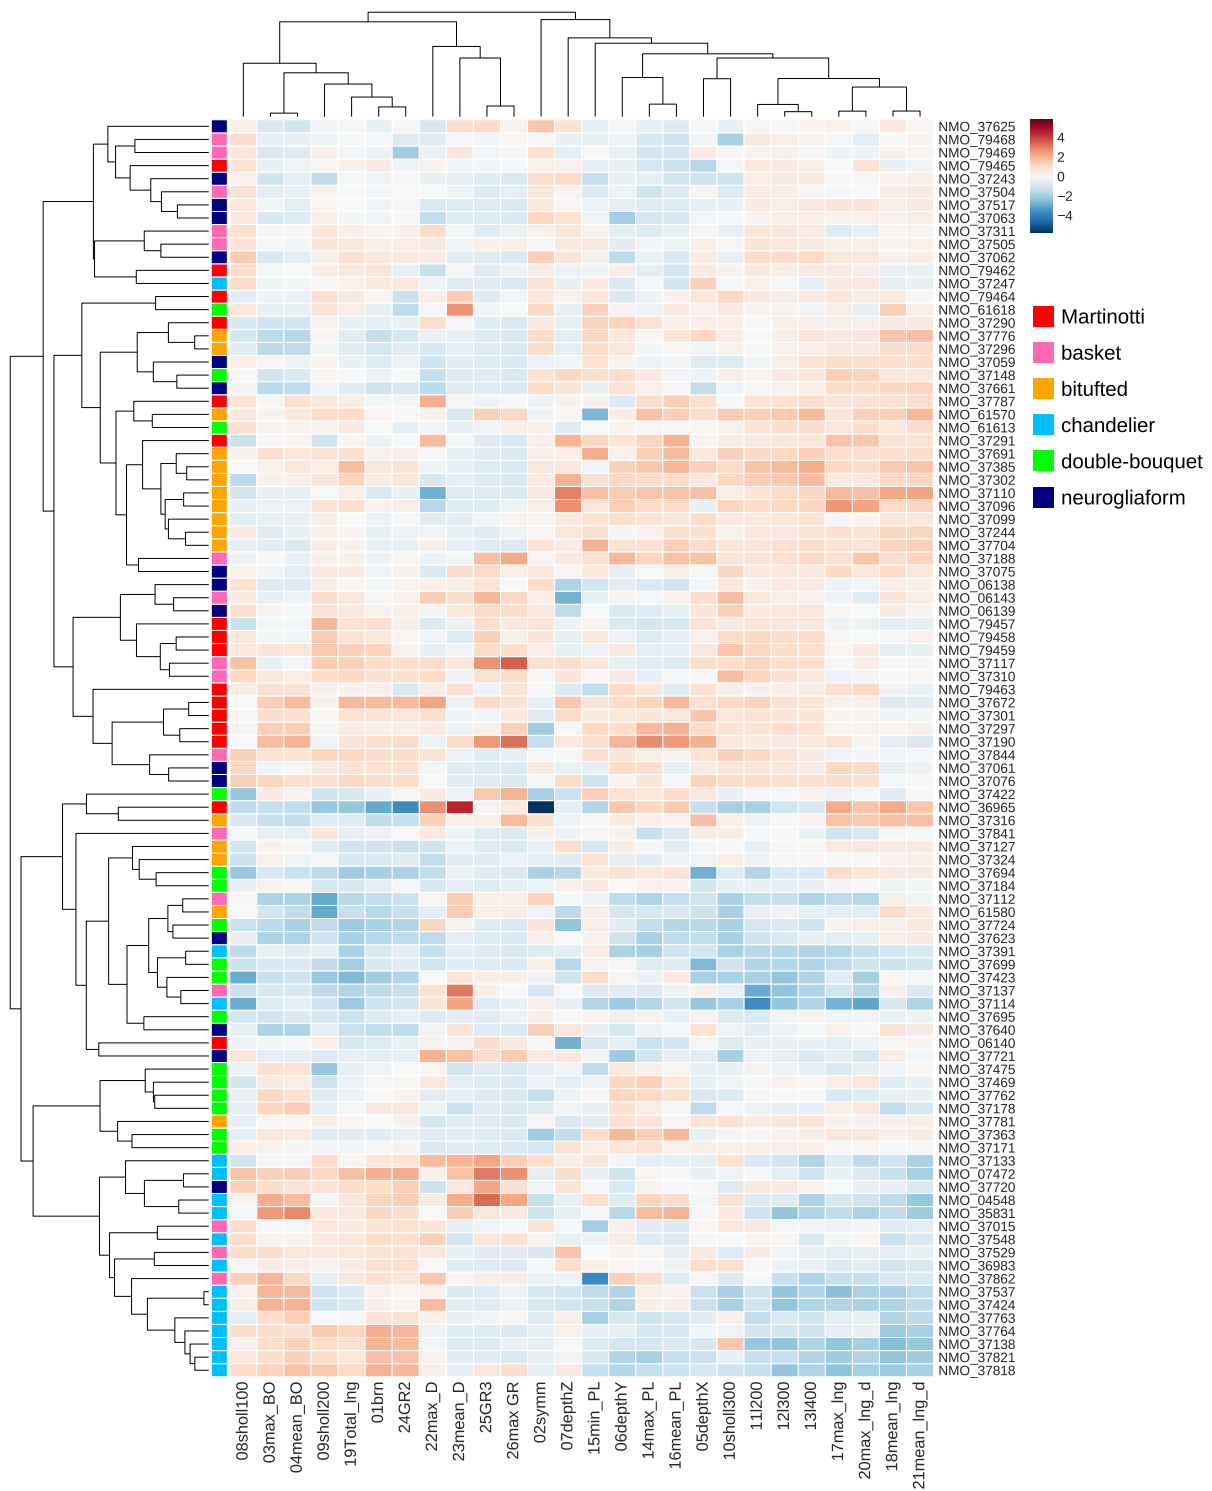

**Figure S1: A heatmap comparing the distributions of morphological parameters.** The parameters were transferred to  $z$ -score values. The *NeuroMorpho.Org* IDs are indicated for each neuron reconstruction on the right side, and the interneuron subtype is indicated by the 'row color' on the left side. The columns are the 28 morphological parameters organized according to the above dendrogram. The left dendrogram clusters the neurons in an unsupervised manner.

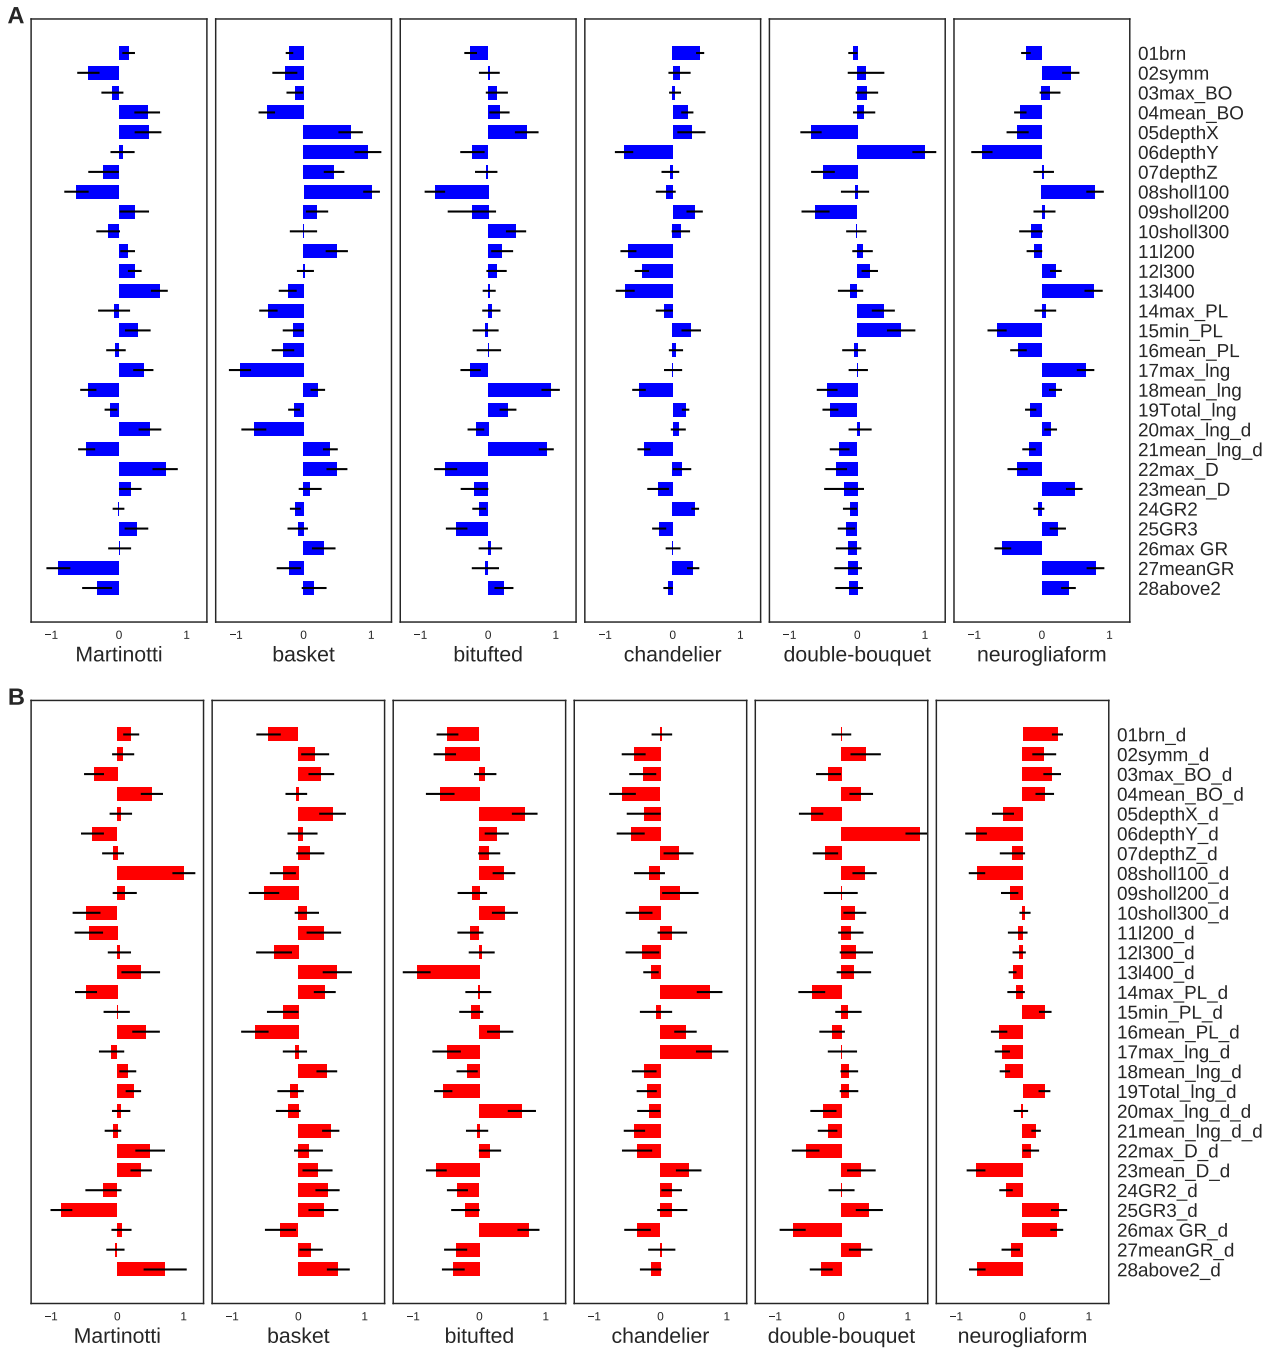

**Figure S2: Logistic regression coefficients.** The average of the logistic regression coefficients for the 1,000 repeats of the axonal (A) and dendritic (B) trees' morphology. Positive values indicate the significance of this feature for the specific interneuron type.

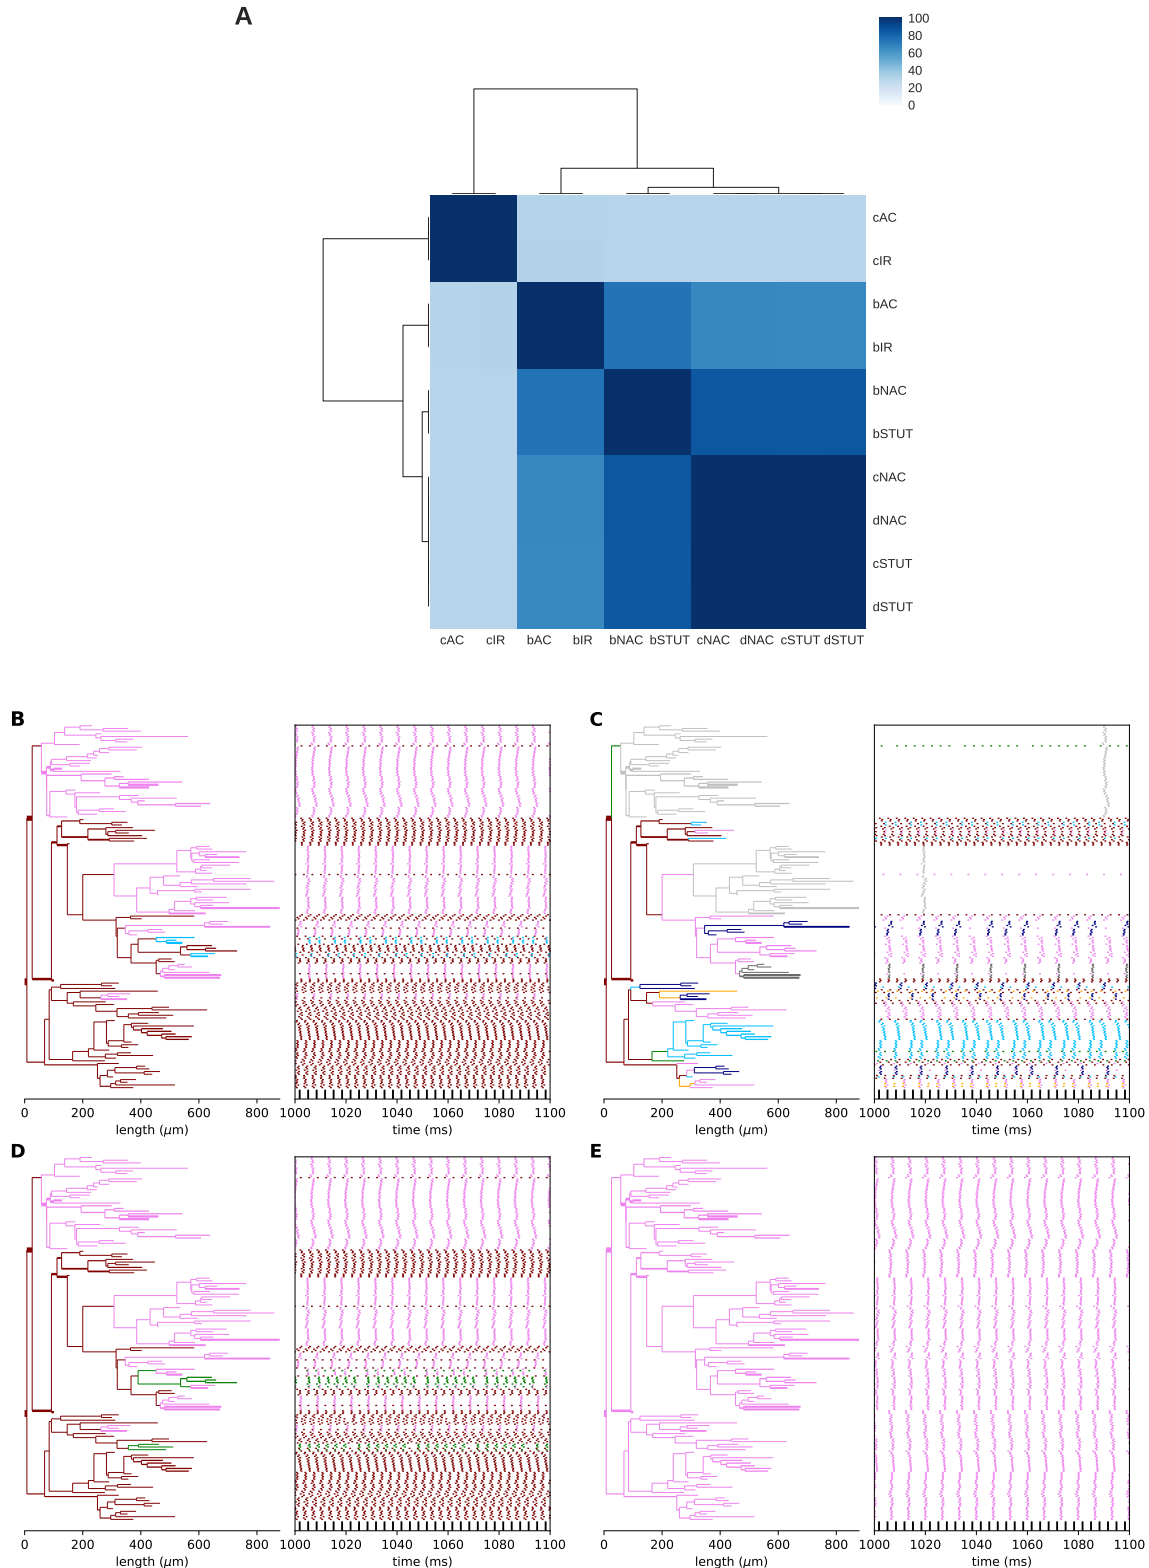

**Figure S3: Comparison between 10 e-types from the BBP.** A heatmap showing the similarity between all 10 interneuron e-types under current pulse frequencies of  $100\text{Hz}$ ,  $200\text{Hz}$ ,  $300\text{Hz}$ , and  $400\text{Hz}$  in terms of firing pattern, in a basket cell (NMO\_06143). In the original experiments conducted by BBP, an elongated current step was induced, resulting in significant differences between these 10 e-types. In our case, the soma was stimulated with strong current pulses, leading to very similar responses in several e-types. Hence, we chose to focus on four e-types: cAC, bAC, bNAC, and cNAC. The response for stimulus frequency of  $300\text{Hz}$ . **B.** ‘cNAC’ (the same as in Fig. 3B), **C.** ‘cAC’, **D.** ‘bNAC’, and **E.** ‘bAC’ e-types. The line color indicates the fraction of spike train that propagates: maroon – 1, orange – 0.75, deep sky blue – 0.66, violet – 0.5, navy – 0.375, dim gray – 0.2, and silver – 0. The same neuron as in Fig. 2.

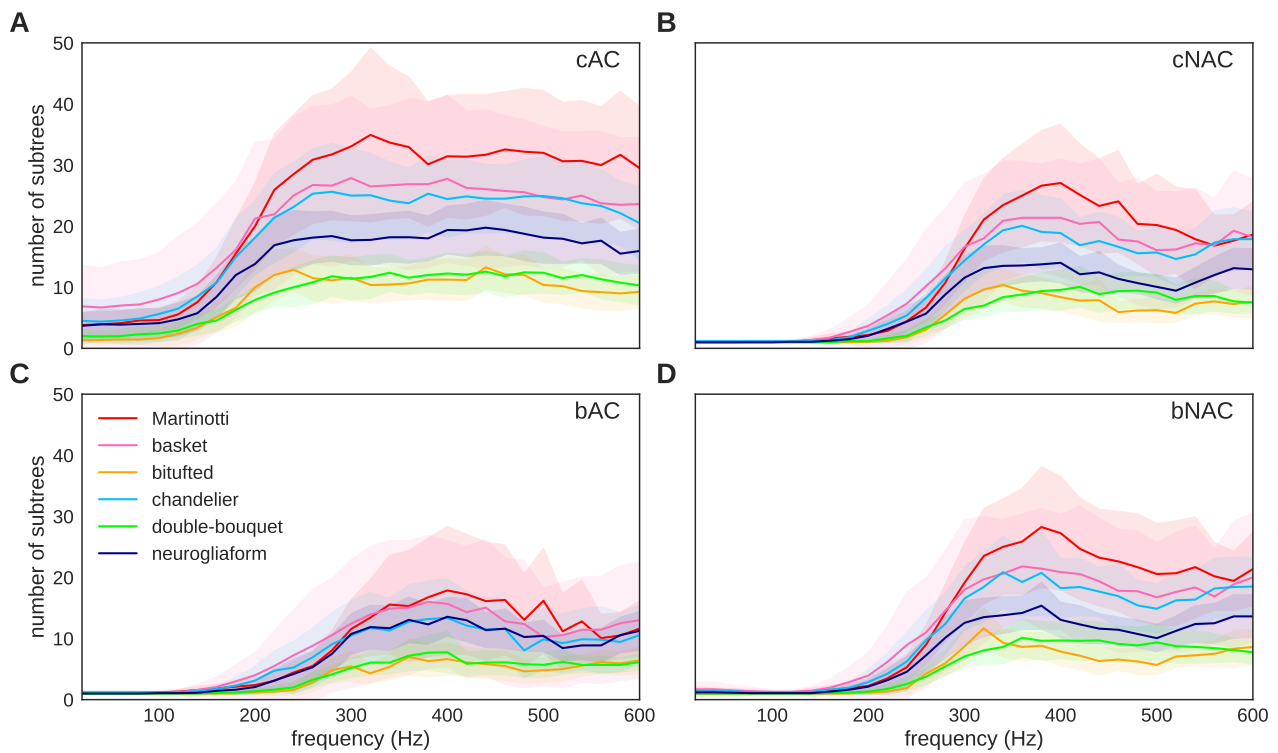

**Figure S4: Axonal response characterized by diversity index as a function of stimulus frequency.** Solid lines represent the mean diversity index ( $q = 0$ ) and the shaded regions represent plus minus one standard deviation. Each panel shows the response for another e-type: **A.** Continuous accommodating (cAC), **B.** Continuous non-accommodating (cNAC), **C.** Burst accommodating (bAC), and **D.** Burst non-accommodating (bNAC).
